# Supplementary material
Source: Springer Nature journal article supplement (https://www.springermedizin.de/resource/supplementary/13012_2012_606_MOESM1_ESM.pdf/9630378)
Supplement: MOESM1 [file 9630378]

**Additional File 1:** Session characteristics and the proportion of BCTs specified in the treatment manuals delivered individual behavioural support sessions; presented by Stop Smoking Service and according to session type.

| <b>Service ID</b>                   | <b>Session ID (Service No./ Transcript No.)</b> | <b>Practitioner ID (Service No./ Transcript No.)</b> | <b>Session type (1=pre-quit; 2=quit-day; 3=post-quit)</b> | <b>Duration (Min.Sec)</b> | <b>Number of BCTs in Manual (according to session type)</b> | <b>Number of manual specified BCTs in Session (%)</b> | <b>Total Number of BCTs in session</b> | <b>Number non-manual specified BCTs in session (% total BCTs)</b> |
|-------------------------------------|-------------------------------------------------|------------------------------------------------------|-----------------------------------------------------------|---------------------------|-------------------------------------------------------------|-------------------------------------------------------|----------------------------------------|-------------------------------------------------------------------|
| <i>Service 1 (n=21 transcripts)</i> |                                                 |                                                      |                                                           |                           |                                                             |                                                       |                                        |                                                                   |
| S01                                 | S01T01                                          | S01P01                                               | 3                                                         | 10.59                     | 10                                                          | 8 (80%)                                               | 14                                     | 6 (43%)                                                           |
| S01                                 | S01T02                                          | S01P01                                               | 3                                                         | 9.36                      | 10                                                          | 6 (60%)                                               | 17                                     | 11 (65%)                                                          |
| S01                                 | S01T03                                          | S01P01                                               | 3                                                         | 8.09                      | 10                                                          | 8 (80%)                                               | 21                                     | 13 (61%)                                                          |
| S01                                 | S01T04                                          | S01P01                                               | 3                                                         | 12.27                     | 10                                                          | 9 (90%)                                               | 22                                     | 13 (59%)                                                          |
| S01                                 | S01T08                                          | S01P02                                               | 3                                                         | 5.01                      | 10                                                          | 5 (50%)                                               | 8                                      | 3 (34%)                                                           |
| S01                                 | S01T10                                          | S01P02                                               | 3                                                         | 5.15                      | 10                                                          | 6 (60%)                                               | 11                                     | 5 (45%)                                                           |
| S01                                 | S01T11                                          | S01P02                                               | 3                                                         | 7.19                      | 10                                                          | 7 (70%)                                               | 21                                     | 14 (66%)                                                          |
| S01                                 | S01T07                                          | S01P03                                               | 2                                                         | 16.46                     | 8                                                           | 6(75%)                                                | 27                                     | 21 (78%)                                                          |
| S01                                 | S01T09                                          | S01P03                                               | 1                                                         | 36.36                     | 13                                                          | 9 (69%)                                               | 25                                     | 16 (64%)                                                          |
| S01                                 | S01T14                                          | S01P03                                               | 3                                                         | 17.00                     | 10                                                          | 5(50%)                                                | 22                                     | 17 (77%)                                                          |
| S01                                 | S01T15                                          | S01P03                                               | 3                                                         | 11.01                     | 10                                                          | 8 (80%)                                               | 22                                     | 14 (64%)                                                          |
| S01                                 | S01T16                                          | S01P03                                               | 3                                                         | 18.21                     | 10                                                          | 8 (80%)                                               | 23                                     | 15 (65%)                                                          |
| S01                                 | S01T06                                          | S01P04                                               | 3                                                         | 16.57                     | 10                                                          | 4 (40%)                                               | 23                                     | 19 (82%)                                                          |
| S01                                 | S01T12                                          | S01P04                                               | 2                                                         | 20.32                     | 8                                                           | 4 (50%)                                               | 19                                     | 15 (79%)                                                          |
| S01                                 | S01T13                                          | S01P04                                               | 1                                                         | 22.19                     | 13                                                          | 9(69%)                                                | 17                                     | 8 (47%)                                                           |
| S01                                 | S01T14                                          | S01P04                                               | 1                                                         | 29.35                     | 13                                                          | 5 (38%)                                               | 20                                     | 15 (75%)                                                          |
| S01                                 | S01T18                                          | S01P04                                               | 3                                                         | 13.51                     | 10                                                          | 8 (80%)                                               | 26                                     | 18 (69%)                                                          |
| S01                                 | S01T21                                          | S01P04                                               | 1                                                         | 26.45                     | 13                                                          | 7 (54%)                                               | 25                                     | 18(72%)                                                           |
| S01                                 | S01T05                                          | S01P05                                               | 3                                                         | 5.45                      | 10                                                          | 5 (50%)                                               | 14                                     | 9 (64%)                                                           |
| S01                                 | S01T19                                          | S01P05                                               | 3                                                         | 21.50                     | 10                                                          | 9(90%)                                                | 22                                     | 13(59%)                                                           |
| S01                                 | S01T20                                          | S01P05                                               | 3                                                         | 15.14                     | 10                                                          | 8(80%)                                                | 24                                     | 16 (67%)                                                          |
| <i>Service 2(n=13 transcripts)</i>  |                                                 |                                                      |                                                           |                           |                                                             |                                                       |                                        |                                                                   |
| S02                                 | S02T08                                          | S02P01                                               | 3                                                         | 5.17                      | 17                                                          | 6 (35%)                                               | 12                                     | 6 (50%)                                                           |
| S02                                 | S02T10                                          | S02P01                                               | 3                                                         | 14.22                     | 17                                                          | 11(64%)                                               | 20                                     | 9 (45%)                                                           |
| S02                                 | S02T11                                          | S02P01                                               | 3                                                         | 8.01                      | 17                                                          | 8 (47%)                                               | 20                                     | 12 (60%)                                                          |
| S02                                 | S02T06                                          | S02P02                                               | 2                                                         | 20.17                     | 21                                                          | 16(76%)                                               | 27                                     | 11 (41%)                                                          |
| S02                                 | S02T13                                          | S02P02                                               | 3                                                         | 11.45                     | 17                                                          | 11(64%)                                               | 23                                     | 12 (52%)                                                          |
| S02                                 | S02T01                                          | S02P03                                               | 1                                                         | 12.10                     | 12                                                          | 8 (67%)                                               | 23                                     | 15 (65%)                                                          |
| S02                                 | S02T02                                          | S02P03                                               | 1                                                         | 5.47                      | 12                                                          | 10 (83%)                                              | 18                                     | 8 (44%)                                                           |
| S02                                 | S02T03                                          | S02P03                                               | 1                                                         | 17.48                     | 12                                                          | 10 (83%)                                              | 25                                     | 15 60%)                                                           |
| S02                                 | S02T09                                          | S02P03                                               | 3                                                         | 8.09                      | 17                                                          | 11 (64%)                                              | 22                                     | 11 (50%)                                                          |
| S02                                 | S02T04                                          | S02P04                                               | 1                                                         | 15.46                     | 12                                                          | 8 (67%)                                               | 26                                     | 18 (69%)                                                          |
| S02                                 | S02T05                                          | S02P04                                               | 2                                                         | 13.15                     | 21                                                          | 18(85%)                                               | 31                                     | 13(42%)                                                           |
| S02                                 | S02T07                                          | S02P04                                               | 3                                                         | 12.31                     | 17                                                          | 9 (53%)                                               | 23                                     | 12 (52%)                                                          |
| S02                                 | S02T12                                          | S02P04                                               | 3                                                         | 18.02                     | 17                                                          | 11 (64%)                                              | 21                                     | 10 (48%)                                                          |
